# Supplementary material
Source: PubMed Central journal article supplement (PMC1602105)
Supplement: NIHMS12535-supplement-FigS1.pdf [file NIHMS12535-supplement-FigS1.pdf]

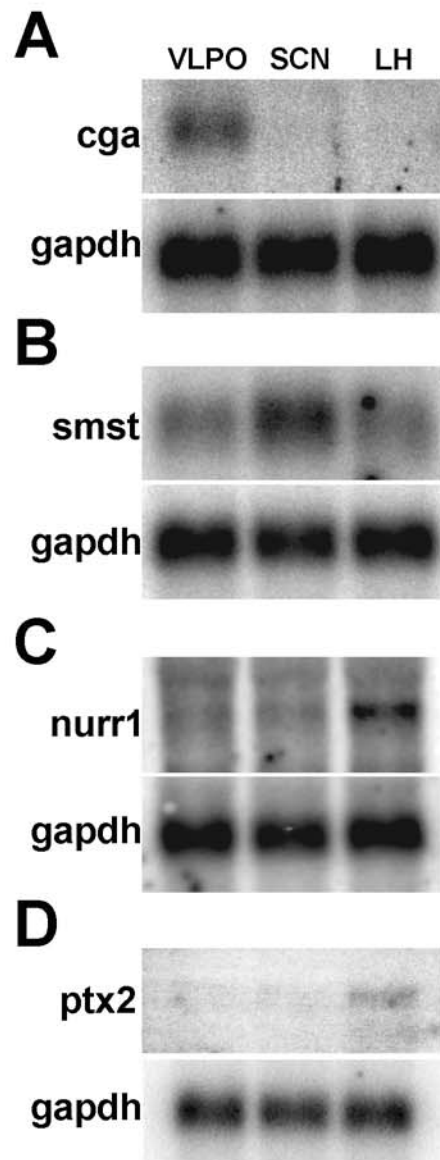

**Figure 1s. Genes enriched in hypothalamic brain regions.**  
 Northern blotting of RNA from tissue punches of ventrolateral preoptic area (VLPO), suprachiasmatic nucleus (SCN) or lateral hypothalamus (LH) were used to validate genes that included A)  $\alpha$ -subunit of glycoprotein hormones (*cga*), B) somatostatin (*smst*), C) *nurr1* and D) *ptx2*. Equal loading of RNA was determined by probing blots with cDNA to glyceraldehyde phosphate dehydrogenase (*gapdh*) in each case. Each lane represents pooled total RNA from tissue punches isolated from 24 animals that were separate from those used to generate RNA for microarray analysis.
