# Supplementary material
Source: PubMed Central journal article supplement (PMC1602105)
Supplement: NIHMS12535-supplement-TableS1.pdf [file NIHMS12535-supplement-TableS1.pdf]

| Supplemental Table S1                   |                      | Enriched List of Genes in VLPO, SCN, and LH                                                          |          |                    |
|-----------------------------------------|----------------------|------------------------------------------------------------------------------------------------------|----------|--------------------|
| Affymetrix ID                           | Gene Symbol          | Description                                                                                          | Unigene  | Fold Change        |
| <b>VLPO ENRICHED LIST (2.5or&gt;FC)</b> |                      |                                                                                                      |          | <b>ave fc vlpo</b> |
| 161049_at                               | <b>Foxg1</b>         | forkhead homolog, brain factor 1                                                                     | Mm.4704  | <b>32.9250709</b>  |
| 94754_at                                | <b>Lhx8</b>          | LIM homeo box protein 8                                                                              | Mm.15530 | <b>16.01563278</b> |
| 93294_at                                | <b>Ctgf</b>          | Fibroblast inducible secreted protein                                                                | Mm.1810  | <b>13.59752202</b> |
| 92803_at                                | <b>Prl</b>           | Prolactin                                                                                            | Mm.1270  | <b>13.42419603</b> |
| 102700_at                               | <b>Tbr1</b>          | T-box brain gene 1                                                                                   | Mm.14158 | <b>11.43013816</b> |
| 94700_at                                | <b>Cga</b>           | Glycoprotein hormones, alpha subunit                                                                 | Mm.1361  | <b>11.40140917</b> |
| 100611_at                               | <b>Lyzs</b>          | Mouse lysozyme M gene                                                                                | Mm.654   | <b>9.356081067</b> |
| 160877_at                               | <b>Ogn</b>           | Mus musculus cDNA,5' end clone IMAGE-1067660                                                         | Mm.4258  | <b>7.469308325</b> |
| 162502_f_at                             | <b>Cga</b>           | Mus musculus cDNA clone 5730406G21                                                                   | Mm.53978 | <b>7.074037936</b> |
| 99549_at                                | <b>Ogn</b>           | Mouse mRNA for osteoglycin                                                                           | Mm.4258  | <b>6.721157581</b> |
| 100412_g_at                             | <b>Aebp1</b>         | Mus musculus aortic carboxypeptidase-like protein ACLP                                               | Mm.4665  | <b>6.215072195</b> |
| 92783_at                                | <b>Gh</b>            | Growth hormone                                                                                       | Mm.1240  | <b>5.702332332</b> |
| 94743_f_at                              | <b>Cfh</b>           | Mouse complement factor H-related protein                                                            | Mm.14450 | <b>4.621360949</b> |
| 93866_s_at                              | <b>Mglap</b>         | Matrix gamma-carboxyglutamate (gla) protein                                                          | Mm.87793 | <b>4.569833852</b> |
| 94122_at                                | <b>Myoc</b>          | Myocilin                                                                                             | Mm.10694 | <b>4.563278099</b> |
| 97990_at                                | <b>Myh11</b>         | Myosin heavy chain 11                                                                                | Mm.3153  | <b>4.494033506</b> |
| 103499_at                               | <b>Vwf</b>           | Mus musculus cDNA, 3' end clone UI-M-AK1-aeq-h-10-0-UI                                               | Mm.22339 | <b>4.346733129</b> |
| 100127_at                               | <b>Crabp2</b>        | Cellular retinoic acid binding protein II                                                            | Mm.4757  | <b>4.298607389</b> |
| 94238_at                                | <b>2310046G15Rik</b> | Mus musculus cDNA, 5' end clone IMAGE-2655017                                                        | Mm.22345 | <b>4.254725135</b> |
| 94305_at                                | <b>Col1a1</b>        | Mus musculus alpha-1 type I procollagen                                                              | Mm.22621 | <b>4.229426975</b> |
| 92291_f_at                              | <b>Cfh</b>           | Mouse complement factor H-related protein                                                            | Mm.37217 | <b>4.015209952</b> |
| 98600_at                                | <b>S100a11</b>       | Mus musculus endothelial monocyte-activating polypeptide I                                           | Mm.383   | <b>3.969837715</b> |
| 93534_at                                | <b>Dcn</b>           | Decorin                                                                                              | Mm.1987  | <b>3.438944637</b> |
| 93541_at                                | <b>Tagln</b>         | Transgelin                                                                                           | Mm.2006  | <b>3.425003864</b> |
| 101054_at                               | <b>Ii</b>            | Mouse Ia-associated invariant chain (Ii)                                                             | Mm.7043  | <b>3.246551751</b> |
| 104083_at                               | <b>AA408225</b>      | Mus musculus cDNA, 3' end clone UI-M-BH0-ajh-f-11-0-UI                                               | Mm.21767 | <b>3.234582998</b> |
| 93100_at                                | <b>Acta2</b>         | Mouse mRNA for vascular smooth muscle alpha-actin                                                    | Mm.16537 | <b>3.11697477</b>  |
| 103534_at                               | <b>Mm.2329</b>       | Mouse gene for beta-1-globin                                                                         | Mm.2329  | <b>3.059061346</b> |
| 98627_at                                | <b>Igfbp2</b>        | Insulin-like growth factor binding protein 2                                                         | Mm.38748 | <b>3.01686782</b>  |
| 94176_at                                | <b>Lhx6</b>          | LIM-homeodomain (LHX) protein 6.1a                                                                   | Mm.12881 | <b>2.967382379</b> |
| 160511_at                               | <b>Cxcl12</b>        | Stromal cell derived factor 1                                                                        | Mm.465   | <b>2.862804872</b> |
| 94143_at                                | <b>Gfap</b>          | Glial fibrillary acidic protein                                                                      | Mm.1239  | <b>2.633284443</b> |
| <b>SCN ENRICHED LIST (2.5or&gt;FC)</b>  |                      |                                                                                                      |          | <b>ave fc scn</b>  |
| 100700_s_at                             | <b>Nr5a1</b>         | nuclear receptor subfamily 5, group A, member 1                                                      | Mm.1416  | <b>3.85595979</b>  |
| 95436_at                                | <b>Smst</b>          | Somatostatin                                                                                         | Mm.2453  | <b>3.547639513</b> |
| 103235_at                               | <b>0710005A05Rik</b> | Mus musculus cDNA, 3' end clone UI-M-AH1-ago-g-03-0-UI                                               | Mm.20342 | <b>3.428951466</b> |
| 160705_at                               | <b>Cited1</b>        | CBP/p300-interacting transactivators with glutamic acid/ aspartic acid-rich carboxyl-terminal domain | Mm.42175 | <b>2.437138927</b> |
| <b>LH ENRICHED LIST (2.5or&gt;FC)</b>   |                      |                                                                                                      |          | <b>ave fc lh</b>   |
| 102788_s_at                             | <b>Pitx2</b>         | Paired-like homeodomain transcription factor 2                                                       | Mm.1385  | <b>44.16888068</b> |
| 94098_at                                | <b>Hcrt</b>          | Hypocretin                                                                                           | Mm.10096 | <b>24.43525774</b> |
| 93913_at                                | <b>3110018A08Rik</b> | Mus musculus cDNA, 3' end clone IMAGE-1432548                                                        | Mm.89587 | <b>14.83369442</b> |
| 99893_at                                | <b>Fgf13</b>         | Fibroblast growth factor 13                                                                          | Mm.7995  | <b>3.289321849</b> |
| 97692_at                                | <b>Htr2c</b>         | 5-HT1c receptor                                                                                      | Mm.378   | <b>2.93093336</b>  |
| 92248_at                                | <b>Nurr1</b>         | Nur related protein 1                                                                                | Mm.3507  | <b>2.923188981</b> |
| 96055_at                                | <b>Cck</b>           | Cholecystokinin                                                                                      | Mm.2619  | <b>2.798630414</b> |
