# Supplementary material
Source: PubMed Central journal article supplement (PMC1602105)
Supplement: NIHMS12535-supplement-TableS2.pdf [file NIHMS12535-supplement-TableS2.pdf]

| Supplemental Table S2 |                 | Genes Elevated in VLPO at ZT6                                    |          |             |
|-----------------------|-----------------|------------------------------------------------------------------|----------|-------------|
| Affymetrix ID         | Gene Symbol     | Description                                                      | Unigene  | Fold Change |
| 92803_at              | Prl             | prolactin                                                        | Mm.1270  | 17.98       |
| 94700_at              | Cga             | glycoprotein hormones, alpha subunit                             | Mm.1361  | 16.4        |
| 162502_f_at           | Cga             | glycoprotein hormones, alpha subunit                             | Mm.53978 | 13.03       |
| 97741_at              | Tshb            | thyroid stimulating hormone, beta subunit                        | Mm.4001  | 9.6         |
| 92783_at              | GH              | growth hormone                                                   | Mm.1240  | 8.59        |
| 94026_at              | Pomc1           | pro-opiomelanocortin-alpha                                       | Mm.21878 | 7.34        |
| 160841_at             | Dbp             | D site albumin promoter binding protein                          | Mm.3459  | 2.85        |
| 98967_at              | Fabp7           | fatty acid binding protein 7, brain                              | Mm.3644  | 2.69        |
| 101737_at             | FSH-b           | follicle stimulating hormone beta                                | Mm.57060 | 2.47        |
| 101738_at             | LH              | luteinizing hormone beta                                         | Mm.57061 | 2.4         |
| 97692_at              | Htr2c           | 5-hydroxytryptamine (serotonin) receptor 2C                      | Mm.378   | 2.33        |
| 161003_at             | Kif3b           | kinesin family member 3b                                         | Mm.27973 | 2.32        |
| 97474_r_at            | Ptn             | pleiotrophin                                                     | Mm.3063  | 2.26        |
| 101946_at             | Lypla1          | lysophospholipase 1                                              | Mm.95696 | 2.19        |
| 160862_at             | Ptp4a3          | protein tyrosine phosphatase 4a3                                 | Mm.4124  | 2.18        |
| 97760_at              | Mtap2           | microtubule-associated protein 2                                 | Mm.413   | 2.13        |
| 95418_at              | 1190017B18Rik   | RIKEN 1190017B18 gene                                            | Mm.24348 | 1.98        |
| 93212_at              | Hspc121-pending | butyrate-induced transcript 1                                    | Mm.57023 | 1.91        |
| 104249_g_at           | 0610038P07Rik   | RIKEN 0610038P07 gene                                            | Mm.28345 | 1.9         |
| 101524_at             | 2610209F03Rik   | RIKEN 2610209F03 gene                                            | Mm.86187 | 1.87        |
| 96679_at              | Dnajb9          | DnaJ (Hsp40) homolog, subfamily B, member 9                      | Mm.27432 | 1.87        |
| 101629_s_at           | Stx1b2          | syntaxin 1B2                                                     | Mm.6224  | 1.81        |
| 98872_at              | Ugt8            | UDP-glucuronosyltransferase 8                                    | Mm.5160  | 1.79        |
| 98490_at              | 2610313E07Rik   | RIKEN 2610313E07 gene                                            | Mm.35596 | 1.78        |
| 98864_s_at            | Grik2           | glutamate receptor, ionotropic, kainate 2 (beta 2)               | Mm.5135  | 1.78        |
| 95031_at              | 1110059H15Rik   | RIKEN 1110059H15 gene                                            | Mm.27520 | 1.77        |
| 92502_at              | Zac1            | zinc finger protein regulator of apoptosis and cell cycle arrest | Mm.42200 | 1.75        |
| 100925_at             | 2700089E24Rik   | RIKEN 2700089E24 gene                                            | Mm.608   | 1.74        |
| 98287_at              | Dpp6            | dipeptidylpeptidase 6                                            | Mm.42078 | 1.74        |
| 96433_at              | Usp29           | ubiquitin specific protease 29                                   | Mm.25177 | 1.74        |
| 93005_at              | Syt1            | synaptotagmin 1                                                  | Mm.5101  | 1.73        |
| 92673_at              | Sh3d2a          | SH3 domain protein 2A                                            | Mm.4493  | 1.73        |
| 94470_i_at            | 1810010K08Rik   | RIKEN 1810010K08 gene                                            | Mm.28851 | 1.72        |
| 95606_at              | Nsap1l-pending  | NS1-associated protein 1-like                                    | Mm.27972 | 1.72        |
| 95800_s_at            | Zfa             | zinc finger protein, autosomal                                   | Mm.87837 | 1.72        |
| 92816_r_at            | Eif4a1          | eukaryotic translation initiation factor 4A1                     | Mm.12858 | 1.69        |
| 101975_at             | Dlk1            | delta-like 1 homolog (Drosophila)                                | Mm.95633 | 1.69        |
| 92183_at              | Dtna            | dystrobrevin alpha                                               | Mm.3386  | 1.68        |
| 161784_f_at           | Star            | steroidogenic acute regulatory protein                           | Mm.90785 | 1.68        |
| 98458_at              | Birc5           | baculoviral IAP repeat-containing 5                              | Mm.34757 | 1.64        |
| 103202_at             | Gbp3            | guanylate nucleotide binding protein 3                           | Mm.1909  | 1.62        |
| 99889_at              | Smstr5          | somatostatin receptor type 5                                     | Mm.7985  | 1.61        |
| 99048_g_at            | Mobp            | myelin-associated oligodendrocytic basic protein                 | Mm.3915  | 1.59        |
| 98112_r_at            | Lap3            | leucine aminopeptidase 3                                         | Mm.34832 | 1.59        |
| 161557_at             | Mnat1           | menage a trois 1                                                 | Mm.66921 | 1.58        |
| 94076_i_at            | Rpn2            | ribophorin II                                                    | Mm.22130 | 1.56        |

|             |               |                                                                                |          |      |
|-------------|---------------|--------------------------------------------------------------------------------|----------|------|
| 92484_at    | Hivep2        | human immunodeficiency virus type I enhancer binding protein 2                 | Mm.42157 | 1.54 |
| 104115_at   | EST AA409398  | EST AA409398                                                                   | Mm.21963 | 1.54 |
| 160588_at   | 2610109I01Rik | RIKEN 2610109I01 gene                                                          | Mm.11787 | 1.54 |
| 93632_g_at  | Lbcl1         | lymphoid blast crisis-like 1                                                   | Mm.7634  | 1.54 |
| 93214_at    | Camk2d        | calcium/calmodulin-dependent protein kinase II, delta                          | Mm.57082 | 1.53 |
| 104627_at   | 5730450N06Rik | RIKEN 5730450N06 gene                                                          | Mm.24288 | 1.52 |
| 97989_at    | Cam-Prp       | protein phosphatase 3, catalytic subunit, beta isoform                         | Mm.3150  | 1.52 |
| 94463_at    | Clcn3         | chloride channel 3                                                             | Mm.28842 | 1.52 |
| 92272_at    | EST AA408306  | EST AA408306                                                                   | Mm.3609  | 1.52 |
| 92607_at    | Mest          | mesoderm specific transcript                                                   | Mm.1089  | 1.52 |
| 99367_at    | 5530600P05Rik | RIKEN 5530600P05 gene                                                          | Mm.56829 | 1.52 |
| 93857_at    | Kpna3         | karyopherin (importin) alpha 3                                                 | Mm.87674 | 1.52 |
| 92736_at    | Slc7a2        | solute carrier family 7 (cationic amino acid transporter, y+ system), member 2 | Mm.4676  | 1.51 |
| 160901_at   | Fos           | FBJ osteosarcoma oncogene                                                      | Mm.5043  | 1.5  |
| 94913_at    | G3bp2         | Ras-GTPase-activating protein (GAP<120>) SH3-domain binding protein 2          | Mm.2411  | 1.5  |
| 94055_at    | Ctnn          | cortactin                                                                      | Mm.22024 | 1.5  |
| 95563_at    | Arih1         | ariadne ubiquitin-conjugating enzyme E2 binding protein homolog 1 (Drosophila) | Mm.27783 | 1.5  |
| 97824_at    | 2410130M07Rik | RIKEN 2410130M07 gene                                                          | Mm.28203 | 1.49 |
| 100372_at   | Gabrg1        | gamma-aminobutyric acid (GABA-A) receptor, subunit gamma 1                     | Mm.88838 | 1.49 |
| 104005_at   | B4galt2       | UDP-Gal:betaGlcNAc beta 1,4- galactosyltransferase, polypeptide 2              | Mm.26693 | 1.49 |
| 92938_at    | Gabra1        | gamma-aminobutyric acid (GABA-A) receptor, subunit alpha 1                     | Mm.4914  | 1.49 |
| 104508_at   | EST AI463083  | EST AI463083                                                                   | Mm.30805 | 1.49 |
| 94068_at    | Rps19         | ribosomal protein S19                                                          | Mm.22103 | 1.48 |
| 101362_at   | Mapk9         | mitogen activated protein kinase 9                                             | Mm.68933 | 1.48 |
| 100366_at   | Casp9         | caspase 9                                                                      | Mm.88829 | 1.48 |
| 97340_at    | Sart3         | squamous cell carcinoma antigen recognized by T-cells 3                        | Mm.29594 | 1.48 |
| 160936_at   | 1810049E02Rik | RIKEN 1810049E02 gene                                                          | Mm.89875 | 1.47 |
| 160955_at   | 2010309E21Rik | RIKEN 2010309E21 gene                                                          | Mm.209   | 1.47 |
| 102342_at   | Nsf           | N-ethylmaleimide sensitive fusion protein                                      | Mm.1117  | 1.47 |
| 101889_s_at | Rora          | RAR-related orphan receptor alpha                                              | Mm.8858  | 1.47 |
| 101837_g_at | Ppm1b         | protein phosphatase 1B, magnesium dependent, beta isoform                      | Mm.849   | 1.47 |
| 96044_at    | Bcl2l10       | Bcl2-like 10                                                                   | Mm.25988 | 1.47 |
| 102696_s_at | Pitpnb        | phosphatidylinositol transfer protein, beta                                    | Mm.14147 | 1.46 |
| 93818_g_at  | Sid394p       | coated vesicle membrane protein                                                | Mm.21507 | 1.46 |
| 98762_f_at  | Zfp97         | zinc finger protein 97                                                         | Mm.4596  | 1.46 |
| 101295_s_at | Icln          | chloride channel regulator Icln (Icln) pseudogene                              | Mm.56919 | 1.46 |
| 92890_at    | Kif1a         | kinesin heavy chain member 1A                                                  | Mm.4762  | 1.45 |
| 101508_at   | Khdrbs1       | KH domain containing, RNA binding, signal transduction associated 1            | Mm.8256  | 1.45 |
| 100508_at   | Mfng          | manic fringe homolog (Drosophila)                                              | Mm.517   | 1.45 |
| 93895_s_at  | Itpr1         | inositol 1,4,5-triphosphate receptor 1                                         | Mm.89190 | 1.45 |
| 162080_f_at | 2900008M13Rik | RIKEN 2900008M13 gene                                                          | Mm.96009 | 1.45 |
| 100569_at   | Anxa2         | annexin A2                                                                     | Mm.584   | 1.45 |
| 102773_at   | Cals1         | carbonic anhydrase-like sequence 1                                             | Mm.1336  | 1.44 |
| 102959_at   | Tle4          | transducin-like enhancer of split 4, E(spl) homolog (Drosophila)               | Mm.17915 | 1.44 |

|             |               |                                                                          |          |      |
|-------------|---------------|--------------------------------------------------------------------------|----------|------|
| 94135_at    | Tcfcp2        | transcription factor CP2                                                 | Mm.1139  | 1.44 |
| 99076_at    | Thra          | thyroid hormone receptor alpha                                           | Mm.4015  | 1.44 |
| 104179_at   | EST AI788669  | EST AI788669                                                             | Mm.27308 | 1.43 |
| 95419_at    | H1f0          | H1 histone family, member 0                                              | Mm.24350 | 1.43 |
| 93789_s_at  | Sin3b         | transcriptional regulator, SIN3B (yeast)                                 | Mm.2137  | 1.43 |
| 93831_at    | Nono          | non-POU-domain-containing, octamer binding protein                       | Mm.21559 | 1.43 |
| 98004_at    | Pkia          | protein kinase inhibitor, alpha                                          | Mm.3193  | 1.43 |
| 99628_at    | Sfrs5         | splicing factor, arginine/serine-rich 5 (SRp40, HRS)                     | Mm.43331 | 1.43 |
| 95712_at    | Orc6l         | origin recognition complex, subunit 6-like (S. cerevisiae)               | Mm.29709 | 1.43 |
| 94471_r_at  | 1810010K08Rik | RIKEN 1810010K08 gene                                                    | Mm.28851 | 1.43 |
| 100441_s_at | Ank1          | ankyrin 1, erythroid                                                     | Mm.4789  | 1.42 |
| 160098_s_at | Cryab         | crystallin, alpha B                                                      | Mm.178   | 1.42 |
| 160605_s_at | 4833420O05Rik | RIKEN 4833420O05 gene                                                    | Mm.13437 | 1.42 |
| 97227_at    | Gna12         | guanine nucleotide binding protein, alpha 12                             | Mm.27773 | 1.42 |
| 96587_at    | Arf3          | ADP-ribosylation factor 3                                                | Mm.30412 | 1.42 |
| 95848_at    | 1810005K14Rik | RIKEN 1810005K14 gene                                                    | Mm.24888 | 1.42 |
| 97130_at    | Ate1          | arginine-tRNA-protein transferase 1                                      | Mm.34599 | 1.42 |
| 99378_f_at  | 0610037M15Rik | RIKEN 0610037M15                                                         | Mm.56926 | 1.42 |
| 97500_g_at  | Fhl1          | four and a half LIM domains 1                                            | Mm.3126  | 1.41 |
| 104583_at   | 2400007G07Rik | RIKEN 2400007G07 gene                                                    | Mm.23975 | 1.41 |
| 95289_r_at  | EST AI848406  | EST AI848406                                                             | Mm.1882  | 1.41 |
| 93921_at    | Bat 3         | HLA-B-associated transcript 3                                            | Mm.89855 | 1.41 |
| 97312_at    | Cd164         | CD164 antigen                                                            | Mm.28083 | 1.41 |
| 95785_s_at  | Rab7          | RAB7, member RAS oncogene family                                         | Mm.87807 | 1.41 |
| 94361_at    | Ddx21         | DEAD/H (Asp-Glu-Ala-Asp/His) box polypeptide 21 (RNA helicase II/Gu)     | Mm.25264 | 1.41 |
| 100065_r_at | Gja1          | gap junction membrane channel protein alpha 1                            | Mm.4504  | 1.41 |
| 92384_at    | Xpa           | xeroderma pigmentosum, complementation group A                           | Mm.4049  | 1.4  |
| 101198_at   | Cplx1         | complexin 1                                                              | Mm.5195  | 1.4  |
| 93664_at    | Atp1b2        | ATPase, Na <sup>+</sup> /K <sup>+</sup> transporting, beta 2 polypeptide | Mm.8041  | 1.4  |
| 93909_f_at  | none          | Intracisternal A particles, Thbd                                         | Mm.89480 | 1.4  |
| 101465_at   | Stat1         | signal transducer and activator of transcription 1                       | Mm.8249  | 1.4  |

Genes Elevated in VLPO at ZT18

| Affymetrix ID | Gene Symbol     | Description                                                      | Unigene  | Fold Change |
|---------------|-----------------|------------------------------------------------------------------|----------|-------------|
| 161435_i_at   | 1810013D10Rik   | RIKEN 1810013D10 gene                                            | Mm.62231 | 2.94        |
| 104333_at     | G7e-pending     | viral envelope like protein                                      | Mm.22506 | 2.68        |
| 93694_at      | Per2            | period homolog 2 (Drosophila)                                    | Mm.8471  | 2.2         |
| 99435_at      | Fgf7            | fibroblast growth factor 7                                       | Mm.57177 | 2.18        |
| 160068_at     | Sap30           | sin3 associated polypeptide, 30kD                                | Mm.118   | 2.12        |
| 100946_at     | Hsp70-1         | heat shock protein, 70 kDa 1                                     | Mm.6388  | 2.03        |
| 97253_at      | 2810411G23Rik   | RIKEN 2810411G23 gene                                            | Mm.27872 | 1.87        |
| 102758_at     | Rbm6            | RNA binding motif protein 6                                      | Mm.12931 | 1.83        |
| 93046_at      | 1700030K07Rik   | RIKEN 1700030K07 gene                                            | Mm.1521  | 1.74        |
| 99816_at      | Hsp70-2         | heat shock protein, 70 kDa 2                                     | Mm.57245 | 1.68        |
| 92877_at      | Tgfb1           | transforming growth factor, beta induced, 68 kDa                 | Mm.14455 | 1.68        |
| 96254_at      | Dnajb1          | DnaJ (Hsp40) homolog, subfamily B, member 1                      | Mm.2982  | 1.67        |
| 93017_at      | Sdcbp           | syntenin (syndecan binding protein)                              | Mm.14744 | 1.64        |
| 99513_at      | Pla2g4a         | phospholipase A2, group IVA (cytosolic, calcium-dependent)       | Mm.4186  | 1.64        |
| 100326_f_at   | Klra8           | killer cell lectin-like receptor, subfamily A, member 8          | Mm.87782 | 1.63        |
| 92977_s_at    | Hmx3            | H6 homeo box 3                                                   | Mm.5016  | 1.62        |
| 95466_at      | Clp-pending     | coactosin-like protein                                           | Mm.24758 | 1.62        |
| 100905_at     | 1700056O17Rik   | RIKEN 1700056O17 gene                                            | Mm.5772  | 1.61        |
| 160254_at     | 1110036C17Rik   | RIKEN 1110036C17 gene                                            | Mm.27846 | 1.6         |
| 101631_at     | Sox11           | SRY-box containing gene 11                                       | Mm.6238  | 1.6         |
| 103344_at     | Dnajc1          | DnaJ (Hsp40) homolog, subfamily C, member 1                      | Mm.18237 | 1.6         |
| 99903_at      | Dmp1            | dentin matrix protein 1                                          | Mm.8011  | 1.59        |
| 102101_f_at   | Plp             | proteolipid protein (myelin)                                     | Mm.42440 | 1.55        |
| 95617_at      | Rbl2            | retinoblastoma-like 2                                            | Mm.28027 | 1.55        |
| 95564_at      | EST AU018638    | EST AU018638                                                     | Mm.27785 | 1.55        |
| 102812_i_at   | 5730525G14Rik   | RIKEN 5730525G14 gene                                            | Mm.14253 | 1.54        |
| 92531_at      | EST AI844545    | EST AI844545                                                     | Mm.43345 | 1.53        |
| 99587_at      | Rab7            | RAB7, member RAS oncogene family                                 | Mm.4268  | 1.53        |
| 95069_at      | EST AA940430    | EST AA940430                                                     | Mm.29187 | 1.53        |
| 98767_at      | Yy1             | YY1 transcription factor                                         | Mm.463   | 1.52        |
| 98394_at      | Dlx1            | distal-less homeobox 1                                           | Mm.4543  | 1.51        |
| 161480_i_at   | Rplp1           | ribosomal protein, large, P1                                     | Mm.64084 | 1.5         |
| 98961_at      | B3galt3         | UDP-Gal:betaGlcNAc beta 1,3-galactosyltransferase, polypeptide 3 | Mm.36174 | 1.5         |
| 97919_at      | 1110021E09Rik   | RIKEN 1110021E09 gene                                            | Mm.30132 | 1.5         |
| 99577_at      | Kitl            | kit ligand                                                       | Mm.4235  | 1.5         |
| 92918_at      | F7              | coagulation factor VII                                           | Mm.4827  | 1.5         |
| 99030_at      | Il7r            | interleukin 7 receptor                                           | Mm.389   | 1.5         |
| 94985_at      | Nsap1-pending   | NS1-associated protein 1                                         | Mm.27303 | 1.49        |
| 94203_at      | ESTs (Mm.13144) |                                                                  | Mm.13144 | 1.49        |
| 92672_at      | 5530400H20Rik   | RIKEN 5530400H20 gene                                            | Mm.44906 | 1.49        |
| 95437_at      | Cop1-pending    | constitutive photomorphogenic protein 1 (Arabidopsis)            | Mm.24538 | 1.48        |
| 95462_at      | 1110001I24Rik   | RIKEN 1110001I24 gene                                            | Mm.24745 | 1.48        |

|             |                |                                                                                                   |          |      |
|-------------|----------------|---------------------------------------------------------------------------------------------------|----------|------|
| 102866_at   | Tead4          | TEA domain family member 4                                                                        | Mm.14774 | 1.48 |
| 96651_at    | Smарce1(Baf57) | SWI/SNF related, matrix associated, actin dependent regulator of chromatin, subfamily e, member 1 | Mm.27330 | 1.47 |
| 160330_at   | Chordc1        | cysteine and histidine-rich domain (CHORD)-containing, zinc-binding protein 1                     | Mm.29138 | 1.47 |
| 160877_at   | Ogn            | osteoglycin                                                                                       | Mm.4258  | 1.47 |
| 96598_at    | none           | EST Mus musculus cDNA, 5' end clone IMAGE-596253                                                  | Mm.309   | 1.47 |
| 96758_s_at  | none           | EST clone MGC:6302 IMAGE:2655022, mRNA, complete cds                                              | Mm.28994 | 1.46 |
| 104114_at   | 2310050N11Rik  | RIKEN 2310050N11 gene                                                                             | Mm.21954 | 1.46 |
| 104678_at   | Gas7           | growth arrest specific 7                                                                          | Mm.3257  | 1.46 |
| 93669_f_at  | Sox11          | SRY-box containing gene 11                                                                        | Mm.80595 | 1.45 |
| 160262_at   | Mtch2-pending  | mitochondrial carrier homolog 2                                                                   | Mm.28023 | 1.45 |
| 160343_at   | 2310020D23Rik  | RIKEN 2310020D23 gene                                                                             | Mm.29452 | 1.45 |
| 104605_at   | EST AI115388   | EST AI115388                                                                                      | Mm.24126 | 1.45 |
| 160783_at   | none           | Similar to KIAA0831 protein, clone IMAGE:4950756, mRNA, partial cds                               | Mm.28446 | 1.44 |
| 93178_at    | Ngef           | neuronal guanine nucleotide exchange factor                                                       | Mm.539   | 1.44 |
| 103791_at   | Narg1          | NMDA receptor-regulated gene 1                                                                    | Mm.24956 | 1.44 |
| 102046_at   | Nssr           | neural-salient serine/arginine-rich                                                               | Mm.10229 | 1.44 |
| 98515_at    | Gtf2e2         | general transcription factor IIE, polypeptide 2 (beta subunit, 34kD)                              | Mm.36088 | 1.44 |
| 96191_at    | EST AI852124   | EST AI852124                                                                                      | Mm.28512 | 1.43 |
| 97220_at    | Dscr2          | Down syndrome critical region homolog 2 (human)                                                   | Mm.27746 | 1.43 |
| 93210_g_at  | Nek4           | NIMA (never in mitosis gene a)-related expressed kinase 4                                         | Mm.57013 | 1.43 |
| 103397_at   | Hrb            | HIV-1 Rev binding protein                                                                         | Mm.18713 | 1.43 |
| 104352_at   | Brd4           | bromodomain-containing 4                                                                          | Mm.22572 | 1.43 |
| 98169_s_at  | EST AU020229   | EST AU020229                                                                                      | Mm.26206 | 1.42 |
| 161616_f_at | 2410012A13Rik  | RIKEN 2410012A13 gene                                                                             | Mm.68896 | 1.42 |
| 101406_at   | Sult2b1        | sulfotransferase family, cytosolic, 2B, member 1                                                  | Mm.7316  | 1.42 |
| 94103_at    | Tspy-ps        | Testis specific protein-Y encoded, pseudogene                                                     | Mm.10106 | 1.42 |
| 100749_at   | none           | Est Mus musculus cDNA, 3' end clone IMAGE-777914                                                  | Mm.3802  | 1.42 |
| 96657_at    | Sat            | spermidine/spermine N1-acetyl transferase                                                         | Mm.2734  | 1.41 |
| 160807_at   | Agpat3         | 1-acylglycerol-3-phosphate O-acyltransferase 3                                                    | Mm.29485 | 1.41 |
| 98061_at    | 1110001K21Rik  | RIKEN 1110001K21 gene                                                                             | Mm.34388 | 1.41 |
| 100457_at   | Selel          | selectin, endothelial cell, ligand                                                                | Mm.488   | 1.41 |
| 161462_r_at | 2610005L07Rik  | RIKEN 2610005L07 gene                                                                             | Mm.63173 | 1.41 |
| 100886_f_at | Mrpl45         | mitochondrial ribosomal protein L45                                                               | Mm.5381  | 1.4  |
| 93497_at    | C3             | complement component 3                                                                            | Mm.19131 | 1.4  |
| 160900_at   | Gkap42         | 42 kD cGMP-dependent protein kinase anchoring protein                                             | Mm.5030  | 1.4  |
| 94940_at    | Mccc1          | methylcrotonoyl-Coenzyme A carboxylase 1 (alpha)                                                  | Mm.26925 | 1.4  |
| 95028_r_at  | none           | Est, Mus musculus cDNA, 3' end clone J0024D07                                                     | Mm.27511 | 1.4  |
| 95050_at    | Chordc1        | cysteine and histidine-rich domain (CHORD)-containing, zinc-binding protein 1                     | Mm.29138 | 1.4  |
| 160731_at   | Rab25          | RAB25, member RAS oncogene family                                                                 | Mm.26994 | 1.4  |
| 94838_r_at  | Plf            | proliferin                                                                                        | Mm.22777 | 1.4  |
| 102024_at   | Ncoa3          | nuclear receptor coactivator 3                                                                    | Mm.1011  | 1.4  |

| Genes Elevated in SCN at ZT6 |                 |                                                                        |          |             |
|------------------------------|-----------------|------------------------------------------------------------------------|----------|-------------|
| Affymetrix ID                | Gene Symbol     | Description                                                            | Unigene  | Fold Change |
| 97760_at                     | Mtap2           | microtubule-associated protein 2                                       | Mm.413   | 4.85        |
| 102572_at                    | Rasgrf2         | RAS protein-specific guanine nucleotide-releasing factor 2             | Mm.57233 | 4.18        |
| 160841_at                    | Dbp             | D site albumin promoter binding protein                                | Mm.3459  | 3.12        |
| 104685_g_at                  | Grin1           | glutamate receptor, ionotropic, NMDA1 (zeta 1)                         | Mm.3292  | 3.05        |
| 96587_at                     | Arf3            | ADP-ribosylation factor 3                                              | Mm.30412 | 2.86        |
| 93212_at                     | Hspc121-pending | butyrate-induced transcript 1                                          | Mm.57023 | 2.73        |
| 103968_at                    | Mid2            | midline 2                                                              | Mm.25678 | 2.61        |
| 98967_at                     | Fabp7           | fatty acid-binding protein 7, brain                                    | Mm.3644  | 2.58        |
| 97560_at                     | Psap            | prosaposin                                                             | Mm.89451 | 2.53        |
| 104249_g_at                  | 0610038P07Rik   | RIKEN 0610038P07 gene                                                  | Mm.28345 | 2.42        |
| 95418_at                     | 1190017B18Rik   | RIKEN 1190017B18 gene                                                  | Mm.24348 | 2.24        |
| 92294_at                     | EST AA408731    | EST AA408731                                                           | Mm.3727  | 2.13        |
| 102081_at                    | Rbig1           | retinoblastoma inhibiting gene 1                                       | Mm.42093 | 2.08        |
| 94378_at                     | Rgs16           | regulator of G-protein signaling 16                                    | Mm.2555  | 2.07        |
| 95031_at                     | 1110059H15Rik   | RIKEN 1110059H15 gene                                                  | Mm.27520 | 2.02        |
| 102259_at                    | Ywhag           | 3-monooxygenase/tryptophan 5-monooxygenase activation protein, gamma   | Mm.10802 | 2.02        |
| 97948_at                     | Rb1             | retinoblastoma 1                                                       | Mm.304   | 1.99        |
| 92890_at                     | Kif1a           | kinesin heavy chain member 1A                                          | Mm.4762  | 1.97        |
| 103569_at                    | Sh3glb1         | SH3-domain GRB2-like B1; endophilin                                    | Mm.19281 | 1.92        |
| 94922_i_at                   | D8Ertd69e       | DNA segment, Chr 8, ERATO Doi 69, expressed                            | Mm.26609 | 1.87        |
| 101837_g_at                  | Ppm1b           | protein phosphatase 1B, magnesium dependent, beta                      | Mm.849   | 1.86        |
| 97533_at                     | Fcgrt           | Fc receptor, IgG, alpha chain transporter                              | Mm.3303  | 1.85        |
| 97797_at                     | 2210409M21Rik   | RIKEN 2210409M21 gene                                                  | Mm.28111 | 1.82        |
| 93694_at                     | Per2            | period homolog 2 (Drosophila)                                          | Mm.8471  | 1.82        |
| 92802_s_at                   | Plp             | myelin; proteolipid protein                                            | Mm.1268  | 1.81        |
| 99036_s_at                   | Map2k7          | mitogen activated protein kinase kinase 7                              | Mm.3906  | 1.79        |
| 99528_at                     | Spin            | spindlin                                                               | Mm.42151 | 1.77        |
| 93789_s_at                   | Sin3b           | transcriptional regulator, SIN3B; yeast                                | Mm.2137  | 1.77        |
| 96333_g_at                   | Snx2            | sorting nexin 2                                                        | Mm.29971 | 1.74        |
| 101684_r_at                  | Srst            | simple repeat sequence-containing transcript                           | Mm.35868 | 1.73        |
| 104343_f_at                  | 2310004B05Rik   | RIKEN 2310004B05 gene                                                  | Mm.22526 | 1.72        |
| 97247_at                     | 2610034N03Rik   | RIKEN 2610034N03 gene                                                  | Mm.27847 | 1.7         |
| 98410_at                     | Gtpi-pending    | interferon-g induced GTPase                                            | Mm.33902 | 1.7         |
| 99558_at                     | Ccnc            | cyclin C                                                               | Mm.4300  | 1.69        |
| 96606_at                     | Chp-pending     | calcium binding protein P22                                            | Mm.27065 | 1.68        |
| 99893_at                     | Fgf13           | fibroblast growth factor 13                                            | Mm.7995  | 1.67        |
| 98539_at                     | Cops2           | COP9 'constitutive photomorphogenic' homolog, 2 (Arabidopsis thaliana) | Mm.3596  | 1.67        |
| 101362_at                    | Mapk9           | Mitogen activated protein kinase 9                                     | Mm.68933 | 1.66        |
| 97124_at                     | Fin15           | fibroblast growth factor inducible 15                                  | Mm.3421  | 1.66        |
| 93922_g_at                   | Bat3            | HLA-B-associated transcript 3                                          | Mm.89855 | 1.62        |
| 103356_at                    | 3110056M06Rik   | RIKEN 3110056M06 gene                                                  | Mm.18425 | 1.61        |
| 97511_at                     | Mgl1            | monoglyceride lipase                                                   | Mm.31616 | 1.61        |
| 92870_at                     | Sellh           | Sell 'suppressor of lin-12' 1 homolog (C. elegans)                     | Mm.14352 | 1.61        |
| 100371_at                    | Hnrpa1          | heterogeneous nuclear ribonucleoprotein A1                             | Mm.88834 | 1.61        |
| 93214_at                     | Camk2d          | calcium/calmodulin-dependent protein kinase II, delta                  | Mm.57082 | 1.6         |
| 97195_at                     | Gnai1           | guanine nucleotide binding protein, alpha inhibiting 1                 | Mm.36875 | 1.6         |

|                              |               |                                                                                                                                                                                             |          |      |
|------------------------------|---------------|---------------------------------------------------------------------------------------------------------------------------------------------------------------------------------------------|----------|------|
| 99076_at                     | Thra          | thyroid hormone receptor alpha                                                                                                                                                              | Mm.4015  | 1.59 |
| 100979_at                    | Trif          | Trif gene                                                                                                                                                                                   | Mm.6703  | 1.58 |
| 160323_at                    | Sra1          | steriod receptor RNA activator 1                                                                                                                                                            | Mm.29058 | 1.58 |
| 99144_s_at                   | Ttgn1         | trans-golgi network protein 1                                                                                                                                                               | Mm.4142  | 1.58 |
| 97130_at                     | Ate1          | arginine-tRNA-protein transferase 1                                                                                                                                                         | Mm.34599 | 1.58 |
| 100418_at                    | Gng2          | guanine nucleotide binding protein (G protein), gamma 2 subunit                                                                                                                             | Mm.46767 | 1.58 |
| 92678_at                     | Ddx25         | DEAD box polypeptide 25 'aspartate-glutamate-alanine-aspartate'                                                                                                                             | Mm.45108 | 1.57 |
| 102346_at                    | Erc3          | Similar to excision repair cross-complementing rodent repair deficiency, complementation group 3 'xeroderma pigmentosum group B complementing), clone MGC:29007 IMAGE:3153847, mRNA, compl) | Mm.11218 | 1.57 |
| 160642_at                    | Tmem5         | transmembrane protein 5                                                                                                                                                                     | Mm.198   | 1.55 |
| 93114_at                     | Atp5j2        | ATP synthase, H+ transporting, mitochondrial F0 complex, subunit f, isoform 2                                                                                                               | Mm.1674  | 1.55 |
| 98101_at                     | Gtf2a2        | general transcription factor lia, 2                                                                                                                                                         | Mm.34772 | 1.54 |
| 96878_at                     | 1810044O22Rik | RIKEN 1810044O22 gene                                                                                                                                                                       | Mm.30073 | 1.54 |
| 97263_s_at                   | Csnk1d        | casein kinase I, delta                                                                                                                                                                      | Mm.27899 | 1.54 |
| 100372_at                    | Gabrg1        | GABA(A) receptor gamma-1                                                                                                                                                                    | Mm.88838 | 1.53 |
| 99107_at                     | Ghr           | growth hormone receptor                                                                                                                                                                     | Mm.3986  | 1.53 |
| 101561_at                    | Mt2           | metallothionein 2                                                                                                                                                                           | Mm.89170 | 1.53 |
| 98603_s_at                   | Rangap1       | RAN GTPase activating protein 1                                                                                                                                                             | Mm.3833  | 1.52 |
| AFFX-TransRecMur/X57349_3_at | Trfr          | transferrin receptor                                                                                                                                                                        | Mm.26069 | 1.52 |
| 101857_at                    | Srpk2         | serine/arginine-rich protein specific kinase 2                                                                                                                                              | Mm.8709  | 1.52 |
| 160110_at                    | 1300010O06Rik | RIKEN 1300010O06 gene                                                                                                                                                                       | Mm.18795 | 1.52 |
| 98818_at                     | Nr3c1         | Glucocorticoid receptor 1 (nuclear receptor subfamily 3, group C, member 1)                                                                                                                 | Mm.4918  | 1.52 |
| 96583_s_at                   | Kif5a         | kinesin family member 5A                                                                                                                                                                    | Mm.30355 | 1.51 |
| 93918_at                     | Taf9          | TAF9 RNA polymerase II, TATA box binding protein (TBP)-associated factor, 32 kDa                                                                                                            | Mm.89836 | 1.51 |
| 98608_at                     | D6Erd109e     | DNA segment, Chr 6, ERATO Doi 109, expressed                                                                                                                                                | Mm.3845  | 1.51 |
| 101459_at                    | Chd1          | chromodomain helicase DNA binding protein 1                                                                                                                                                 | Mm.8137  | 1.51 |
| 104305_at                    | none          | Mus musculus, similar to Unknown (protein for MGC:14993), clone MGC:28202                                                                                                                   | Mm.22363 | 1.5  |
| 92540_f_at                   | Srm           | spermidine synthase gene                                                                                                                                                                    | Mm.10    | 1.5  |
| 101069_g_at                  | Mkrn1         | makorin ring finger                                                                                                                                                                         | Mm.7198  | 1.5  |
| 93163_at                     | Gabrg2        | GABA-A receptor, gamma 2                                                                                                                                                                    | Mm.5309  | 1.5  |
| 96345_at                     | 2310015B14Rik | RIKEN 2310015B14 gene                                                                                                                                                                       | Mm.29995 | 1.5  |
| 100957_at                    | 2810480P10Rik | RIKEN 2810480P10 gene                                                                                                                                                                       | Mm.6509  | 1.49 |
| 98909_at                     | Lias          | lipoic acid synthetase                                                                                                                                                                      | Mm.28591 | 1.49 |
| 93182_at                     | Nkx6-2        | NK6 transcription factor related, locus 2 (Drosophila)                                                                                                                                      | Mm.5423  | 1.49 |
| 103799_at                    | EST AF073881  | EST AF073881                                                                                                                                                                                | Mm.20844 | 1.49 |
| 92480_f_at                   | Zfp118        | Zinc finger protein 118                                                                                                                                                                     | Mm.42140 | 1.49 |
| 96188_at                     | Adar          | adenosine deaminase, RNA-specific                                                                                                                                                           | Mm.28502 | 1.49 |
| 93005_at                     | Syt1          | synaptotagmin 1                                                                                                                                                                             | Mm.5101  | 1.48 |
| 94689_at                     | EST C79248    | EST C79248                                                                                                                                                                                  | Mm.13291 | 1.48 |
| 95478_at                     | 1110020I04Rik | RIKEN 1110020I04 gene                                                                                                                                                                       | Mm.24848 | 1.48 |
| 98024_at                     | Nfyb          | nuclear transcription factor-Y beta                                                                                                                                                         | Mm.3259  | 1.48 |
| 93993_at                     | 1300009F09Rik | RIKEN 1300009F09 gene                                                                                                                                                                       | Mm.21752 | 1.48 |
| 93366_r_at                   | 2410174K12Rik | RIKEN 2410174K12 gene                                                                                                                                                                       | Mm.18972 | 1.47 |
| 94885_at                     | 4632417G13Rik | RIKEN 4632417G13 gene                                                                                                                                                                       | Mm.23889 | 1.47 |
| 102319_at                    | Snx12         | sorting nexin 12                                                                                                                                                                            | Mm.10704 | 1.47 |
| 104671_at                    | Ampd3         | AMP deaminase 3                                                                                                                                                                             | Mm.4848  | 1.46 |

|                              |               |                                                                                |          |      |
|------------------------------|---------------|--------------------------------------------------------------------------------|----------|------|
| 102247_at                    | Ubr1          | ubiquitin protein ligase E3 component n-recogin 1                              | Mm.10731 | 1.46 |
| 100931_at                    | As2           | arylsulfatase A                                                                | Mm.620   | 1.46 |
| 162179_r_at                  | Blmh          | bleomycin hydrolase                                                            | Mm.98081 | 1.46 |
| 94076_i_at                   | Rpn2          | ribophorin II                                                                  | Mm.22130 | 1.46 |
| 94471_r_at                   | 1810010K08Rik | RIKEN 1810010K08 gene                                                          | Mm.28851 | 1.46 |
| 104340_at                    | Mbd1          | methyl-CpG binding domain protein 1                                            | Mm.22522 | 1.45 |
| 99176_at                     | Fibp          | fibroblast growth factor 'acidic' intracellular binding protein                | Mm.41785 | 1.45 |
| 94451_at                     | D13Wsu123e    | DNA segment, Chr 13, Wayne State University 123, expressed                     | Mm.28786 | 1.45 |
| 95079_at                     | Pdgfra        | platelet derived growth factor receptor, alpha polypeptide                     | Mm.2924  | 1.45 |
| 102703_s_at                  | Aqp4          | aquaporin 4                                                                    | Mm.1419  | 1.44 |
| 160804_at                    | Gapd          | glyceraldehyde-3-phosphate dehydrogenase                                       | Mm.29383 | 1.44 |
| 160611_at                    | EST AU043077  | EST AU043077                                                                   | Mm.1554  | 1.44 |
| 103712_at                    | none          | EST Moderately similar to Y029_HUMAN HYPOTHETICAL PROTEIN KIAA0029 {H.sapiens} | Mm.24109 | 1.44 |
| 160098_s_at                  | Cryab         | crystallin, alpha B                                                            | Mm.178   | 1.43 |
| 98956_at                     | 1810049E02Rik | RIKEN 1810049E02 gene                                                          | Mm.28765 | 1.43 |
| 97462_at                     | 3110006P09Rik | RIKEN 3110006P09 gene                                                          | Mm.3035  | 1.43 |
| 102324_at                    | Dnajc4        | Hsp40-C,4                                                                      | Mm.10721 | 1.43 |
| 98989_at                     | Dhcr7         | 7-dehydrocholesterol reductase                                                 | Mm.3747  | 1.43 |
| 101088_f_at                  | Cnbp          | cellular nucleic acid binding protein                                          | Mm.7335  | 1.43 |
| 93859_at                     | 2410112O06Rik | RIKEN 2410112O06 gene                                                          | Mm.87729 | 1.43 |
| 104673_at                    | Epha4         | Eph receptor A4                                                                | Mm.3249  | 1.43 |
| 93211_at                     | Dnajc5        | Hsp40-C,5                                                                      | Mm.57022 | 1.43 |
| 96529_at                     | EST C76297    | EST C76297                                                                     | Mm.27084 | 1.43 |
| 102754_at                    | Birc6         | baculoviral IAP repeat-containing 6                                            | Mm.12921 | 1.42 |
| 103842_at                    | Dby           | DEAD box polypeptide 'aspartate-glutamate-alanine-aspartate;' Y chromosome     | Mm.20950 | 1.42 |
| 96701_at                     | Uble1b        | ubiquitin-like 1 'sentrin' activating enzyme E1B                               | Mm.27560 | 1.42 |
| 95700_r_at                   | Dnajc8        | Hsp40-C, 8                                                                     | Mm.29685 | 1.42 |
| AFFX-b-ActinMur/M1248_1_5_at | Actb          | actin, beta, cytoplasmic                                                       | Mm.297   | 1.42 |
| 100484_at                    | Mmp13         | matrix metalloproteinase 13                                                    | Mm.5022  | 1.42 |
| 97404_at                     | 1500034J01Rik | RIKEN 1500034J01 gene                                                          | Mm.29901 | 1.41 |
| 100887_at                    | 3830418C19Rik | RIKEN 3830418C19 gene                                                          | Mm.5383  | 1.41 |
| 100133_at                    | Fyn           | Fyn proto-oncogene                                                             | Mm.4848  | 1.41 |
| 92618_at                     | Serf2         | small EDRK-rich factor 2                                                       | Mm.1106  | 1.41 |
| 160788_at                    | Pes1          | pescadillo homolog 1, containing BRCT domain (zebrafish)                       | Mm.28659 | 1.41 |
| 94482_at                     | Csnk2a2       | casein kinase II, alpha 2, polypeptide                                         | Mm.28881 | 1.4  |
| 94877_at                     | Btbd1         | BTB 'POZ' domain containing 1                                                  | Mm.23839 | 1.4  |
| 103708_at                    | Eif1a         | eukaryotic translation initiation factor 1A                                    | Mm.24090 | 1.4  |
| 160933_at                    | Igtp          | interferon gamma induced GTPase                                                | Mm.858   | 1.4  |
| 102221_at                    | Syngr1        | synaptogyrin 1                                                                 | Mm.10217 | 1.4  |

## Genes Elevated in SCN at ZT18

| Affymetrix ID | Gene Symbol    | Description                                                                | Unigene  | Fold Change |
|---------------|----------------|----------------------------------------------------------------------------|----------|-------------|
| 161562_f_at   | none           | ESTs, Weakly similar to zinc finger protein 105 [Mus musculus] [M.musulus] | Mm.67110 | 2.64        |
| 92783_at      | Gh             | growth hormone                                                             | Mm.1240  | 2.39        |
| 98110_at      | Mdm2           | transformed mouse 3t3 cell double minute 2                                 | Mm.34810 | 1.99        |
| 161284_r_at   | Txnrd1         | thioredoxin reductase 1                                                    | Mm.85650 | 1.92        |
| 97346_at      | 2610001J05Rik  | RIKEN 2610001J05 gene                                                      | Mm.29615 | 1.89        |
| 95479_at      | C1d-pending    | nuclear DNA binding protein                                                | Mm.2485  | 1.87        |
| 160829_at     | Tdag           | T-cell death associated gene                                               | Mm.3117  | 1.84        |
| 104352_at     | Brd4           | bromodomain-containing 4                                                   | Mm.22572 | 1.83        |
| 161698_f_at   | BC019977       | cDNA sequence BC019977                                                     | Mm.71615 | 1.81        |
| 160903_at     | Apbb2          | amyloid beta (A4) precursor protein-binding, family B, member 2            | Mm.5159  | 1.8         |
| 100946_at     | Hsp70-1        | heat shock protein, 70 kDa 1                                               | Mm.6388  | 1.79        |
| 101501_r_at   | Impact         | imprinted and ancient                                                      | Mm.8154  | 1.76        |
| 103763_at     | Ash1-pending   | absent, small, or homeotic discs 1 (Drosophila)                            | Mm.24637 | 1.75        |
| 98278_at      | Spry4          | sprouty homolog 4 {Drosophila}                                             | Mm.42038 | 1.71        |
| 96666_at      | Ntan1          | N-terminal Asn amidase                                                     | Mm.27378 | 1.69        |
| 93348_at      | Timm22         | translocase of inner mitochondrial membrane 22 homolog 'yeast'             | Mm.18803 | 1.67        |
| 161378_r_at   | Runx2          | runt related transcription factor 2                                        | Mm.60100 | 1.67        |
| 93875_at      | Hsp70-3        | heat shock protein, 70 kDa 3                                               | Mm.88432 | 1.66        |
| 98072_r_at    | Dck            | deoxycytidine kinase                                                       | Mm.3446  | 1.66        |
| 161080_f_at   | 1700012P16Rik  | RIKEN 1700012P16 gene                                                      | Mm.7213  | 1.66        |
| 101965_at     | Rnf13          | ring finger protein 13                                                     | Mm.9326  | 1.65        |
| 103588_at     | Adam15         | a disintegrin and metalloproteinase domain 15 (metargidin)                 | Mm.19830 | 1.65        |
| 99032_at      | Rasd1          | RAS, dexamethasone-induced 1                                               | Mm.3903  | 1.64        |
| 104188_at     | EST AI853703   | EST AI853703                                                               | Mm.27449 | 1.63        |
| 104304_r_at   | 1500004O14Rik  | RIKEN 1500004O14 gene                                                      | Mm.22358 | 1.62        |
| 100533_s_at   | Crem           | cAMP responsive element modulator                                          | Mm.5244  | 1.62        |
| 104090_at     | Rab6kif1       | Rab6, kinesin-like                                                         | Mm.21803 | 1.62        |
| 103303_at     | none           | ESTs                                                                       | Mm.21099 | 1.62        |
| 101853_f_at   | Cfh            | complement component factor h                                              | Mm.8655  | 1.62        |
| 100321_f_at   | 2210418O10Rik  | RIKEN 2210418O10 gene                                                      | Mm.87656 | 1.61        |
| 161980_f_at   | Bag3           | Bcl2-associated athanogene 3                                               | Mm.93932 | 1.6         |
| 92871_at      | EST AW493766   | EST AW493766                                                               | Mm.14352 | 1.59        |
| 97441_at      | Acinus-pending | apoptotic chromatin condensation inducer in the nucleus                    | Mm.30236 | 1.59        |
| 93246_at      | Narg1-pending  | NMDA receptor-regulated gene 1                                             | Mm.6043  | 1.58        |
| 96871_at      | 2310042G06Rik  | RIKEN 2310042G06 gene                                                      | Mm.30065 | 1.58        |
| 100595_at     | Ptp4a2         | protein tyrosine phosphatase 4a2                                           | Mm.6355  | 1.58        |
| 101094_at     | Hig1-pending   | hypoxia induced gene 1                                                     | Mm.7381  | 1.56        |
| 92816_r_at    | Eif4a1         | eukaryotic translation initiation factor 4A1                               | Mm.12858 | 1.55        |
| 92747_at      | Nkx2-2         | NK2 transcription factor related, locus 2 {Drosophila}                     | Mm.4701  | 1.55        |
| 98385_at      | Ptpn14         | protein tyrosine phosphatase, non-receptor type 14                         | Mm.4498  | 1.54        |
| 94483_at      | 1110035J23Rik  | RIKEN 1110035J23 gene                                                      | Mm.28881 | 1.53        |
| 160300_at     | Tff1           | trefoil factor 1                                                           | Mm.2854  | 1.53        |
| 161183_at     | Dag1           | dystroglycan 1                                                             | Mm.55187 | 1.53        |
| 104128_at     | EST AW556797   | EST AW556797                                                               | Mm.22040 | 1.52        |
| 102768_i_at   | Sc5d           | sterol-C5-desaturase, 'fungal ERG3, delta-5-                               | Mm.13081 | 1.52        |

|             |               |                                                                                                                        |          |      |
|-------------|---------------|------------------------------------------------------------------------------------------------------------------------|----------|------|
|             |               | desaturase homolog ( <i>S.cerevisiae</i> )                                                                             |          |      |
| 95913_at    | EST AA407619  | EST AA407619                                                                                                           | Mm.24462 | 1.52 |
| 161695_f_at | Slc6a4        | solute carrier family 6; 'neurotransmitter transporter, serotonin,' member 4                                           | Mm.71570 | 1.51 |
| 100536_at   | EST R74645    | EST R74645                                                                                                             | Mm.5259  | 1.51 |
| 103688_at   | none          | ESTs, Weakly similar to ankyrin repeat and SOCS box-containing protein 7 [ <i>Mus musculus</i> ] [ <i>M.musculus</i> ] | Mm.23940 | 1.51 |
| 104500_at   | Idua          | alpha-L-iduronidase                                                                                                    | Mm.3054  | 1.51 |
| 97474_r_at  | Ptn           | pleiotrophin                                                                                                           | Mm.3063  | 1.51 |
| 95050_at    | Chordc1       | cysteine and histidine-rich domain 'CHORD'-containing, zinc binding protein 1                                          | Mm.29138 | 1.5  |
| 103780_at   | 1700021F05Rik | RIKEN 1700021F05 gene                                                                                                  | Mm.24863 | 1.5  |
| 93277_at    | Hsp60         | heat shock protein, 60kDa                                                                                              | Mm.1777  | 1.49 |
| 103342_at   | Eed           | embryonic ectoderm development                                                                                         | Mm.18203 | 1.49 |
| 104002_at   | Zfp275        | Zinc finger protein 275                                                                                                | Mm.26595 | 1.48 |
| 101359_at   | Lamb2         | laminin, beta 2                                                                                                        | Mm.68887 | 1.48 |
| 103711_at   | EST AI115399  | EST AI115399                                                                                                           | Mm.24100 | 1.48 |
| 99627_r_at  | 0610025G13    | RIKEN 0610025G13 gene                                                                                                  | Mm.43330 | 1.48 |
| 95694_at    | TOP1          | topoisomerase I                                                                                                        | Mm.29663 | 1.47 |
| 104244_at   | EST AU024026  | EST AU024026                                                                                                           | Mm.28210 | 1.47 |
| 161610_at   | Ndr2          | N-myc downstream regulated 2                                                                                           | Mm.68755 | 1.46 |
| 97309_at    | 3110002K08Rik | RIKEN 3110002K08 gene                                                                                                  | Mm.28066 | 1.46 |
| 93064_at    | Bnip2         | BCL2/adenovirus E1B 19 kDa-interacting protein 1, NIP2                                                                 | Mm.1561  | 1.46 |
| 100702_at   | Shbg          | sex hormone binding globulin                                                                                           | Mm.1431  | 1.45 |
| 94250_at    | Eif3          | eukaryotic translation initiation factor 3                                                                             | Mm.2238  | 1.45 |
| 99999_at    | Np220         | nuclear protein 220                                                                                                    | Mm.4503  | 1.45 |
| 160330_at   | Chordc1       | cysteine and histidine-rich domain 'CHORD'-containing, zinc binding protein 1                                          | Mm.29138 | 1.45 |
| 95564_at    | EST AU018638  | EST AU018638                                                                                                           | Mm.27785 | 1.44 |
| 97458_at    | EST AA409223  | EST AA409223                                                                                                           | Mm.30267 | 1.44 |
| 98505_i_at  | Cpo           | coproporphyrinogen oxidase                                                                                             | Mm.35820 | 1.44 |
| 160246_at   | EST AA987150  | EST AA987150                                                                                                           | Mm.27740 | 1.44 |
| 97193_at    | EST AA575098  | EST AA575098                                                                                                           | Mm.36566 | 1.43 |
| 161750_f_at | Ncam          | neural cell adhesion molecule                                                                                          | Mm.73620 | 1.43 |
| 160117_at   | 2310028D20Rik | RIKEN 2310028D20 gene                                                                                                  | Mm.19258 | 1.43 |
| 99370_at    | Klrc1         | killer cell lectin-like receptor subfamily C, member 1                                                                 | Mm.56899 | 1.43 |
| 161435_i_at | 1810013D10Rik | RIKEN 1810013D10 gene                                                                                                  | Mm.62231 | 1.43 |
| 103260_at   | 1110060D06Rik | RIKEN 1110060D06 gene                                                                                                  | Mm.208   | 1.43 |
| 160182_at   | 1210001E11Rik | RIKEN 1210001E11 gene                                                                                                  | Mm.24042 | 1.42 |
| 99529_f_at  | Trif-pending  | Trif gene                                                                                                              | Mm.42154 | 1.42 |
| 101216_at   | none          | EST                                                                                                                    | Mm.5306  | 1.41 |
| 104744_at   | 2610319K07Rik | RIKEN 2610319K07 gene                                                                                                  | Mm.24707 | 1.41 |
| 94817_at    | Serpinh1      | serine (or cysteine) proteinase inhibitor, clade H, member                                                             | Mm.22708 | 1.41 |
| 100970_at   | Akt1          | thymoma viral proto-oncogene 1                                                                                         | Mm.6645  | 1.4  |
| 102955_at   | Nfil3         | nuclear factor, interleukin 3, regulated                                                                               | Mm.1755  | 1.4  |
| 95752_at    | 4733401P19Rik | 4733401P19 gene                                                                                                        | Mm.29784 | 1.4  |
| 103861_s_at | D7Wsu128e     | DNA segment, Chr 7, Wayne State University 128, expressed                                                              | Mm.21103 | 1.4  |
| 160621_at   | Mrps22        | mitochondrial ribosomal protein S22                                                                                    | Mm.17949 | 1.4  |

| Genes Elevated in LH at ZT6  |               |                                                                         |           |             |
|------------------------------|---------------|-------------------------------------------------------------------------|-----------|-------------|
| Affymetrix ID                | Gene Symbol   | Description                                                             | Unigene   | Fold Change |
| 98967_at                     | Fabp7         | fatty acid-binding protein 7, brain                                     | Mm.3644   | 3.58        |
| 97165_r_at                   | D2Ert93e      | DNA segment, Chr 2, ERATO Doi 93, expressed                             | Mm.35523  | 3.33        |
| 99513_at                     | Pla2g4a       | phospholipase A2, group IVA (cytosolic, calcium-dependent)              | Mm.4186   | 3.1         |
| 98867_at                     | Dlx6as        | distal-less homeobox 6, antisense                                       | Mm.5152   | 2.87        |
| 103957_at                    | Trfr          | transferrin receptor                                                    | Mm.25560  | 2.72        |
| 161435_i_at                  | 1810013D10Rik | RIKEN 1810013D10 gene                                                   | Mm.62231  | 2.66        |
| 96875_r_at                   | 1200003J11    | RIKEN 1200003J11 gene                                                   | Mm.30069  | 2.6         |
| 93033_at                     | Ube2e3        | ubiquitin-conjugating enzyme E2E 3, UBC4/5 homolog (yeast)              | Mm.1485   | 2.57        |
| 103086_at                    | Hoxa5         | homeo box A5                                                            | Mm.173    | 2.55        |
| 162172_f_at                  | Nedd4a        | neural precursor cell expressed, developmentally down-regulated gene 4a | Mm.98042  | 2.35        |
| 161390_r_at                  | 2310038G18    | RIKEN 2310038G18 gene                                                   | Mm.60387  | 2.15        |
| 104132_at                    | Noc4          | neighbor of Cox4                                                        | Mm.22072  | 2.07        |
| 100696_at                    | Pde6a         | phosphodiesterase 6A, cGMP-specific, rod, alpha                         | Mm.1370   | 2.04        |
| 101562_at                    | Hsp70-4       | heat shock protein, 70 kDa 4                                            | Mm.89341  | 1.88        |
| 96713_at                     | Papss2        | 3'-phosphoadenosine 5'-phosphosulfate synthase 2                        | Mm.27646  | 1.88        |
| 96533_at                     | Adir          | ATP-dependant interferon responsive                                     | Mm.27464  | 1.84        |
| 101561_at                    | Mt2           | metallothionein 2                                                       | Mm.89170  | 1.8         |
| 93026_at                     | 1500002K10Rik | RIKEN 1500002K10 gene                                                   | Mm.14796  | 1.79        |
| 160280_at                    | Cav           | caveolin, caveolae protein, 22 kDa                                      | Mm.28278  | 1.78        |
| 94814_at                     | Gnai3         | guanine nucleotide binding protein, alpha inhibiting 3                  | Mm.22704  | 1.77        |
| 97948_at                     | Rb1           | retinoblastoma 1                                                        | Mm.304    | 1.77        |
| 161088_r_at                  | EST AI450287  | EST AI450287                                                            | Mm.100209 | 1.76        |
| 93121_at                     | Rps24         | ribosomal protein S24                                                   | Mm.16775  | 1.75        |
| 160841_at                    | Dbp           | D site albumin promoter binding protein                                 | Mm.3459   | 1.75        |
| 162080_f_at                  | 2900008M13Rik | RIKEN 2900008M13 gene                                                   | Mm.96009  | 1.75        |
| 99036_s_at                   | Map2k7        | mitogen activated protein kinase kinase 7                               | Mm.3906   | 1.74        |
| 99463_at                     | Cyp3a13       | cytochrome P450, steroid inducible 3a13                                 | Mm.4094   | 1.73        |
| 95879_at                     | EST C79052    | EST C79052                                                              | Mm.25008  | 1.73        |
| 98610_at                     | 1500012D08Rik | RIKEN 1500012D08 gene                                                   | Mm.38460  | 1.71        |
| 92225_f_at                   | Rpol-2        | RNA polymerase 1-2 '128 kDa subunit'                                    | Mm.34589  | 1.7         |
| 100887_at                    | 3830418C19Rik | RIKEN 3830418C19 gene                                                   | Mm.5383   | 1.68        |
| AFFX-TransRecMur/X57349_3_at | Trfr          | transferrin receptor                                                    | Mm.26069  | 1.68        |
| 93182_at                     | Nkx6-2        | NK6 transcription factor related, locus 2 (Drosophila)                  | Mm.5423   | 1.68        |
| 92770_at                     | S100a6        | S100 calcium binding protein A6 'calcyclin'                             | Mm.1221   | 1.68        |
| 160461_f_at                  | 2310057H16Rik | RIKEN 2310057H16 gene                                                   | Mm.40068  | 1.67        |
| 97139_at                     | EST C77614    | EST C77614                                                              | Mm.34934  | 1.66        |
| 95471_at                     | Cdkn1c        | cyclin-dependent kinase inhibitor 1C 'P57'                              | Mm.2480   | 1.66        |
| 92560_g_at                   | Vcam1         | vascular cell adhesion molecule 1                                       | Mm.1021   | 1.66        |
| 161013_f_at                  | EST AI596360  | EST AI596360                                                            | Mm.30     | 1.65        |
| 161424_f_at                  | 1110049F12Rik | RIKEN 1110049F12 gene                                                   | Mm.61830  | 1.65        |
| 104201_at                    | Plac1         | placental specific protein 1                                            | Mm.27525  | 1.64        |
| 160136_r_at                  | 4933429H19Rik | RIKEN 4933429H19 gene                                                   | Mm.21490  | 1.63        |
| 103696_r_at                  | C330007P06Rik | RIKEN C330007P06 gene                                                   | Mm.23994  | 1.61        |
| 160494_at                    | Endog         | Endonuclease G                                                          | Mm.4449   | 1.61        |
| 94991_at                     | EST AW046661  | EST AW046661                                                            | Mm.27313  | 1.6         |

|             |               |                                                                                |          |      |
|-------------|---------------|--------------------------------------------------------------------------------|----------|------|
| 100324_g_at | none          | S-adenosylmethionine decarboxylase 3                                           | Mm.87749 | 1.6  |
| 161519_f_at | 1700037H04Rik | RIKEN 1700037H04 gene                                                          | Mm.65546 | 1.6  |
| 102910_at   | Abcb1a        | ATP-binding cassette, subfamily B 'MDR/TAP,' member 1A                         | Mm.16086 | 1.6  |
| 94757_at    | Cftr          | cystic fibrosis transmembrane conductance regulator homolog                    | Mm.15621 | 1.6  |
| 96755_at    | MGC18745      | hypothetical protein MGC18745                                                  | Mm.28982 | 1.59 |
| 92216_at    | Madh7         | MAD homolog 7 {Drosophila}                                                     | Mm.34407 | 1.59 |
| 100593_at   | Tnnt2         | troponin T2, cardiac                                                           | Mm.632   | 1.59 |
| 98101_at    | Gtf2a2        | general transcription factor Iia, 2 '12 kD subunit'                            | Mm.34772 | 1.58 |
| 102414_i_at | Dnajc3        | Hsp40-C, 3                                                                     | Mm.12616 | 1.58 |
| 160306_at   | Thrsp         | thyroid hormone responsive SPOT14 homolog (Rattus)                             | Mm.28585 | 1.58 |
| 160068_at   | Sap30         | sin3 associated polypeptide, 30kD                                              | Mm.118   | 1.57 |
| 94917_at    | Fbxo8         | f-box only protein 8                                                           | Mm.24156 | 1.56 |
| 161356_at   | SMAF1         | SMAF1                                                                          | Mm.59260 | 1.56 |
| 101764_at   | Htr1d         | 5-hydroxytryptamine (serotonin) receptor 1D                                    | Mm.57096 | 1.55 |
| 104508_at   | EST AI463083  | EST AI463083                                                                   | Mm.30805 | 1.55 |
| 94057_g_at  | Scd1          | stearoyl-coenzyme A desaturase 1                                               | Mm.22026 | 1.54 |
| 93706_at    | Ikbbk         | inhibitor of kappaB kinase beta                                                | Mm.86427 | 1.53 |
| 162460_f_at | Igpb1         | immunoglobulin (CD79A) binding protein 1                                       | Mm.52833 | 1.52 |
| 92419_at    | Cct6b         | chaperonin subunit 6b (zeta)                                                   | Mm.4126  | 1.52 |
| 92725_at    | Gas11         | growth arrest specific 11                                                      | Mm.46545 | 1.52 |
| 103574_at   | EST AW060987  | EST AW060987                                                                   | Mm.1947  | 1.51 |
| 103527_at   | MGC28785      | hypothetical protein MGC28785                                                  | Mm.23011 | 1.51 |
| 101998_at   | 4833420G17Rik | RIKEN 4833420G17 gene                                                          | Mm.9860  | 1.51 |
| 96836_r_at  | Zfp161        | zinc finger protein 161                                                        | Mm.29434 | 1.51 |
| 92323_at    | Mapk12        | mitogen-activated protein kinase 12                                            | Mm.38343 | 1.5  |
| 93590_at    | 1200015G06Rik | RIKEN 1200015G06 gene                                                          | Mm.20818 | 1.5  |
| 161066_at   | 1500026A19Rik | RIKEN 1500026A19 gene                                                          | Mm.5365  | 1.5  |
| 104549_at   | EST AW495846  | EST AW495846                                                                   | Mm.23702 | 1.49 |
| 98511_at    | Raly          | HnRNP-associate with lethal yellow                                             | Mm.3591  | 1.49 |
| 160428_at   | Suclg2        | succinate-Coenzyme A ligase, GDP-forming, beta subunit                         | Mm.34632 | 1.49 |
| 103658_r_at | Mtf2          | metal response element binding transcription factor 2                          | Mm.20559 | 1.48 |
| 160468_at   | Mtpn          | myotrophin                                                                     | Mm.4143  | 1.48 |
| 103723_at   | Il13ra1       | interleukin 13 receptor, alpha 1                                               | Mm.24208 | 1.48 |
| 160563_at   | Serf2         | small EDRK-rich factor 2                                                       | Mm.91433 | 1.48 |
| 97944_f_at  | Tcra-VII.1d   | T cell receptor alpha chain, variable region gene                              | Mm.30295 | 1.47 |
| 161522_i_at | Cst3          | cystatin C                                                                     | Mm.65647 | 1.47 |
| 95479_at    | C1d-pending   | nuclear DNA binding protein                                                    | Mm.2485  | 1.47 |
| 94530_at    | LOC217715     | similar to eukaryotic translation initiation factor 2B, subunit 2 (beta, 39kD) | Mm.29041 | 1.47 |
| 97243_at    | Slc9a3r1      | solute carrier family 9 'sodium/hydrogen exchanger,' isoform 3 regulator 1     | Mm.27842 | 1.47 |
| 94367_at    | Uck2-pending  | uridine-cytidine kinase 2                                                      | Mm.25309 | 1.46 |
| 100925_at   | 2700089E24Rik | RIKEN 2700089E24 gene                                                          | Mm.608   | 1.45 |
| 99486_at    | Cenpb         | centromere autoantigen B                                                       | Mm.41454 | 1.45 |
| 97593_f_at  | 3632430F08Rik | RIKEN 3632430F08 gene                                                          | Mm.89577 | 1.45 |
| 101050_at   | 0610038L10Rik | RIKEN 0610038L10 gene                                                          | Mm.7013  | 1.45 |
| 95379_at    | Mab2112       | mab-21-like 2 (C. elegans)                                                     | Mm.22988 | 1.45 |
| 160085_at   | Tst           | thiosulfate sulfurtransferase, mitochondrial                                   | Mm.15312 | 1.44 |
| 102703_s_at | Aqp4          | aquaporin 4                                                                    | Mm.1419  | 1.44 |

|             |               |                                                                               |          |      |
|-------------|---------------|-------------------------------------------------------------------------------|----------|------|
| 104091_at   | 670474K14Rik  | RIKEN 670474K14 gene                                                          | Mm.21814 | 1.44 |
| 97248_at    | Dbi           | diazepam binding inhibitor                                                    | Mm.2785  | 1.44 |
| 95118_r_at  | EST AU021460  | EST AU021460                                                                  | Mm.29381 | 1.44 |
| 161160_f_at | Mybl2         | myeloblastosis oncogene-like 2                                                | Mm.82864 | 1.44 |
| 97982_at    | Emu2-pending  | Emu2 gene                                                                     | Mm.3127  | 1.44 |
| 104428_s_at | Matk          | megakaryocyte-associated tyrosine kinase                                      | Mm.2918  | 1.43 |
| 104262_at   | Pthlh         | parathyroid hormone-like peptide                                              | Mm.28440 | 1.43 |
| 98912_at    | D13Wsu64e     | DNA segment, Chr 13, Wayne State University 64, expressed                     | Mm.28600 | 1.42 |
| 96343_at    | Actn4         | alpha actinin 4                                                               | Mm.29991 | 1.42 |
| 161104_at   | EST AA408298  | EST AA408298                                                                  | Mm.24485 | 1.42 |
| 93114_at    | Atp5j2        | ATP synthase, H+ transporting, mitochondrial F0 complex, subunit f, isoform 2 | Mm.1674  | 1.41 |
| 100133_at   | Fyn           | Fyn proto-oncogene                                                            | Mm.4848  | 1.41 |
| 93722_at    | Ensa          | endosulfine alpha                                                             | Mm.86904 | 1.41 |
| 160374_r_at | Ptb2-pending  | polypyrimidine tract binding protein 2                                        | Mm.29966 | 1.41 |
| 162392_r_at | TgN737Rpw     | transgene insert site 737, insertional mutation, polycystic kidney disease    | Mm.50377 | 1.41 |
| 93272_at    | Stk16         | serine/threonine kinase 16                                                    | Mm.17461 | 1.41 |
| 100751_at   | Adam10        | a disintegrin and metalloprotease domain 10                                   | Mm.3911  | 1.41 |
| 162248_f_at | 2010012D11Rik | RIKEN 2010012D11 gene                                                         | Mm.99125 | 1.41 |
| 96795_at    | Faah          | fatty acid amide hydrolase                                                    | Mm.2915  | 1.4  |
| 93301_at    | 1300007B12Rik | RIKEN 1300007B12 gene                                                         | Mm.18230 | 1.4  |
| 95031_at    | 1110059H15Rik | RIKEN 1110059H15 gene                                                         | Mm.27520 | 1.4  |
| 104216_at   | Shoc2         | soc-2 (suppressor of clear) homolog (C. elegans)                              | Mm.27860 | 1.4  |

| Genes Elevated in LH at ZT18 |               |                                                                                                          |          |             |
|------------------------------|---------------|----------------------------------------------------------------------------------------------------------|----------|-------------|
| Affymetrix ID                | Gene Symbol   | Description                                                                                              | Unigene  | Fold Change |
| 161741_r_at                  | LOC218820     | similar to hypothetical protein MGC2555                                                                  | Mm.73405 | 3.25        |
| 100946_at                    | Hsp70-1       | heat shock protein, 70 kDa 1                                                                             | Mm.6388  | 2.47        |
| 160901_at                    | Fos           | FBJ osteosarcoma oncogene                                                                                | Mm.5043  | 2.42        |
| 160970_at                    | EST AI848335  | EST AI848335                                                                                             | Mm.24261 | 2.36        |
| 160917_r_at                  | 2010107K23Rik | RIKEN 2010107K23 gene                                                                                    | Mm.6890  | 2.33        |
| 103968_at                    | Mid2          | midline 2                                                                                                | Mm.25678 | 2.29        |
| 94483_at                     | 1110035J23Rik | RIKEN 1110035J23 gene                                                                                    | Mm.28881 | 2.26        |
| 103582_r_at                  | 6130401J04Rik | RIKEN 6130401J04 gene                                                                                    | Mm.19799 | 2.18        |
| 93694_at                     | Per2          | period homolog 2 (Drosophila)                                                                            | Mm.8471  | 2.03        |
| 92595_r_at                   | Fech          | ferrochelataase                                                                                          | Mm.1070  | 2.03        |
| 99620_at                     | 9030402K04Rik | RIKEN 9030402K04 gene                                                                                    | Mm.43213 | 2.02        |
| 96254_at                     | Dnajb1        | Hsp40, B1                                                                                                | Mm.2982  | 2.01        |
| 104442_at                    | EST AA409087  | EST AA409087                                                                                             | Mm.29302 | 1.99        |
| 160330_at                    | Chordc1       | cystein and histidine-rich domain 'CHORD'-containing, zinc-binding protein 1                             | Mm.29138 | 1.96        |
| 100706_f_at                  | D2Wsu23e      | DNA segment, Chr 2, Wayne State University 23, expressed                                                 | Mm.27840 | 1.92        |
| 94985_at                     | Nsap1-pending | NS1-associated protein 1                                                                                 | Mm.27303 | 1.92        |
| 104340_at                    | Mbd1          | methyl-CpG binding domain protein 1                                                                      | Mm.22522 | 1.9         |
| 95888_at                     | Laf4l         | lymphoid nuclear protein related to AF4-like                                                             | Mm.24018 | 1.87        |
| 98042_at                     | Risc-pending  | retinoid-inducible serine carboxypetidase                                                                | Mm.34126 | 1.83        |
| 98470_at                     | Slc25a14      | solute carrier family 25 'mitochondrial carrier, brain'-member 14                                        | Mm.34953 | 1.79        |
| 101906_at                    | EST C79747    | EST C79747                                                                                               | Mm.89817 | 1.79        |
| 95749_at                     | Armet         | arginine-rich, mutated in early stage tumors                                                             | Mm.29778 | 1.77        |
| 93285_at                     | Dusp6         | dual specificity phosphatase 6                                                                           | Mm.1791  | 1.77        |
| 94433_at                     | EST AI316867  | EST AI316867                                                                                             | Mm.26492 | 1.72        |
| 99882_at                     | Ids           | iduronate 2-sulfatase                                                                                    | Mm.7973  | 1.72        |
| 103975_at                    | Prdc-pending  | protein related to DAN and cerberus                                                                      | Mm.25760 | 1.71        |
| 94517_r_at                   | Penk1         | preproenkephalin 1                                                                                       | Mm.2899  | 1.69        |
| 160605_s_at                  | 4833420O05Rik | RIKEN 4833420O05 gene                                                                                    | Mm.13437 | 1.67        |
| 103711_at                    | EST AI115399  | EST AI115399                                                                                             | Mm.24100 | 1.67        |
| 161086_at                    | Veli3-pending | vertebrate homolog of C. elegans Lin-7 type 3                                                            | Mm.9573  | 1.67        |
| 160335_at                    | Gclm          | glutamate-cysteine ligase, modifier subunit                                                              | Mm.29340 | 1.66        |
| 94000_at                     | Cd8b          | CD8 antigen, beta chain                                                                                  | Mm.21764 | 1.65        |
| 100512_at                    | Uch15         | ubiquitin carboxyl-terminal esterase L5                                                                  | Mm.52067 | 1.64        |
| 160791_at                    | 3300001P08Rik | RIKEN 3300001P08 gene                                                                                    | Mm.28778 | 1.64        |
| 160182_at                    | 1210001E11Rik | RIKEN 1210001E11 gene                                                                                    | Mm.24042 | 1.63        |
| 103808_at                    | Golga5        | golgi autoantigen, golgin subfamily a, 5                                                                 | Mm.20885 | 1.62        |
| 94209_g_at                   | 1700015E05Rik | RIKEN 1700015E05 gene                                                                                    | Mm.2220  | 1.61        |
| 160472_r_at                  | Tmeff1        | transmembrane protein with EGF-like and two follistatin-like domains 1                                   | Mm.41772 | 1.6         |
| 94273_at                     | 2610311119Rik | RIKEN 2610311119 gene                                                                                    | Mm.22485 | 1.6         |
| 96891_at                     | Anp32b        | acidic nuclear phosphoprotein 32 family, member B                                                        | Mm.30093 | 1.55        |
| 95050_at                     | Chordc1       | cystein and histidine-rich domain 'CHORD'-containing, zinc-binding protein 1                             | Mm.29138 | 1.55        |
| 104373_at                    | EST AW212954  | EST AW212954                                                                                             | Mm.22645 | 1.55        |
| 92182_at                     | none          | ESTs, Weakly similar to Rap2 interacting protein; Rap2 interacting protein 8 [Mus musculus] [M.musculus] | Mm.33851 | 1.55        |
| 103892_r_at                  | Ell2          | ELL-related RNA polymerase II, elongation factor                                                         | Mm.21288 | 1.54        |

|             |               |                                                           |          |      |
|-------------|---------------|-----------------------------------------------------------|----------|------|
| 102955_at   | Nfil3         | nuclear factor, interleukin 3, regulated                  | Mm.1755  | 1.54 |
| 99816_at    | Hsp70-2       | heat shock protein, 70 kDa 2                              | Mm.57245 | 1.53 |
| 101215_at   | Gabra2        | GABA-A receptor, alpha 2                                  | Mm.5304  | 1.53 |
| 160373_i_at | Sdpr          | serum deprivation response                                | Mm.29964 | 1.53 |
| 103664_r_at | 2810452K22Rik | RIKEN 2810452K22 gene                                     | Mm.20693 | 1.52 |
| 96698_at    | Psm5          | proteasome 'prosome macropain' 26S subunit, non-ATPase, 5 | Mm.27558 | 1.52 |
| 160121_at   | 2810017M24Rik | RIKEN 2810017M24 gene                                     | Mm.20216 | 1.52 |
| 102980_at   | EST AW536594  | EST AW536594                                              | Mm.1896  | 1.51 |
| 98478_at    | Ccng2         | cyclin G2                                                 | Mm.3527  | 1.5  |
| 104449_at   | Glr3          | glycine receptor, beta subunit                            | Mm.29422 | 1.5  |
| 102217_at   | Gprk5         | G protein-coupled receptor kinase 5                       | Mm.10188 | 1.49 |
| 94501_at    | Spph1-pending | sphingosine-1-phosphate phosphatase 1                     | Mm.28948 | 1.48 |
| 103752_r_at | EST AW227545  | EST AW227545                                              | Mm.24516 | 1.48 |
| 103726_at   | 2610311119Rik | RIKEN 2610311119 gene                                     | Mm.24286 | 1.48 |
| 102875_at   | EST C80612    | EST C80612                                                | Mm.14864 | 1.48 |
| 100004_at   | 5930412E23Rik | RIKEN 5930412E23 gene                                     | Mm.45194 | 1.48 |
| 96375_at    | D9Ert306e     | DNA segment, Chr 9, ERATO Doi 306, expressed              | Mm.25065 | 1.48 |
| 94228_at    | Xpo1          | exportin 1, CRM1 homolog (yeast)                          | Mm.22269 | 1.47 |
| 96266_at    | 2610023M21Rik | RIKEN 2610023M21 gene                                     | Mm.29841 | 1.47 |
| 94208_at    | 1700015E05Rik | RIKEN 1700015E05 gene                                     | Mm.2220  | 1.46 |
| 92789_r_at  | Cetn3         | centrin 3                                                 | Mm.12481 | 1.46 |
| 101226_at   | EST J0037D08  | EST J0037D08                                              | Mm.5650  | 1.46 |
| 94821_at    | Xbp1          | X-box binding protein 1                                   | Mm.22718 | 1.46 |
| 93054_at    | 1110054N06Rik | RIKEN 1110054N06 gene                                     | Mm.15351 | 1.46 |
| 98397_at    | 1700030G05Rik | RIKEN 1700030G05 gene                                     | Mm.33285 | 1.46 |
| 103537_at   | Eif2ak3       | eukaryotic translation initiation factor 2 alpha kinase 3 | Mm.23375 | 1.46 |
| 92771_at    | Zfp207        | zinc finger protein 207                                   | Mm.12236 | 1.45 |
| 101955_at   | Hspa5         | heat shock 70kD protein 5 'glucose-regulated protein 78kD | Mm.918   | 1.45 |
| 94418_at    | Lce-pending   | long chain fatty acyl elongase                            | Mm.26171 | 1.45 |
| 104114_at   | 2310050N11Rik | RIKEN 2310050N11 gene                                     | Mm.21954 | 1.45 |
| 94239_at    | Pnn           | pinin                                                     | Mm.22347 | 1.45 |
| 93389_at    | Prom          | prominin                                                  | Mm.6250  | 1.45 |
| 97204_s_at  | 1110003P16Rik | RIKEN 1110003P16 gene                                     | Mm.27692 | 1.45 |
| 160934_s_at | Ccr4          | carbon catabolite repression 4 homolog (S. cerevisiae)    | Mm.86541 | 1.45 |
| 95694_at    | TOP           | topoisomerase I                                           | Mm.29663 | 1.44 |
| 160829_at   | Tdag          | T-cell death associated gene                              | Mm.3117  | 1.44 |
| 104717_at   | 1110068L01    | RIKEN 1110068L01 gene                                     | Mm.24505 | 1.44 |
| 103823_at   | Top3b         | topoisomerase (DNA) III beta                              | Mm.20915 | 1.44 |
| 97846_at    | Cdc51         | cell division cycle 5-like (S.pombe)                      | Mm.28270 | 1.43 |
| 92808_f_at  | Fkbp4         | FK506 binding protein 4 59kDa                             | Mm.12758 | 1.43 |
| 160204_at   | 3110013H01Rik | RIKEN 3110013H01 gene                                     | Mm.25170 | 1.43 |
| 98087_at    | Tbk1          | TANK-binding kinase 1                                     | Mm.34580 | 1.43 |
| 92369_at    | Tgfa          | transforming growth factor alpha                          | Mm.3992  | 1.43 |
| 92754_at    | Fdxr          | ferredoxin reductase                                      | Mm.4719  | 1.43 |
| 98553_at    | Slap          | sarcolemmal-associated protein                            | Mm.36769 | 1.43 |
| 96665_at    | Vps26         | vacuolar protein sorting 26 (yeast)                       | Mm.27373 | 1.43 |
| 99621_s_at  | 9030402K04Rik | RIKEN 9030402K04 gene                                     | Mm.43213 | 1.42 |
| 98904_at    | 1110066C01Rik | RIKEN 1110066C01 gene                                     | Mm.28579 | 1.42 |
| 103088_at   | Chl1          | close homolog of L1                                       | Mm.1736  | 1.42 |

|             |                |                                                                                    |          |      |
|-------------|----------------|------------------------------------------------------------------------------------|----------|------|
| 103525_at   | 2810036L13Rik  | RIKEN 2810036L13 gene                                                              | Mm.2290  | 1.42 |
| 160900_at   | Gkap42-pending | 42 kD cGMP-dependent protein kinase anchoring protein                              | Mm.5030  | 1.42 |
| 100072_at   | Ciao1          | WD40 protein Ciao1                                                                 | Mm.45179 | 1.42 |
| 100954_at   | Hrb            | HIV-1 Rev binding protein                                                          | Mm.6461  | 1.41 |
| 96784_at    | 1110037A17Rik  | RIKEN 1110037A17 gene                                                              | Mm.29082 | 1.41 |
| 104246_at   | none           | EST Moderately similar to T17285 hypothetical protein DKFZp434N0535.1 (H.sapiens)  | Mm.2833  | 1.41 |
| 97285_f_at  | Ubxdc2         | UBX domain-containing 2                                                            | Mm.28000 | 1.41 |
| 96771_at    | none           | ESTs Mus musculus, clone IMAGE:4952369                                             | Mm.29023 | 1.41 |
| 100962_at   | Nab2           | Ngfi-A binding protein 2                                                           | Mm.6549  | 1.41 |
| 96224_at    | Btrc           | beta-transducin repeat containing protein                                          | Mm.28734 | 1.4  |
| 98960_s_at  | b3GT3          | UDP-Gal-betaG1cNAc beta 1,3-galactosyltransferase-III                              | Mm.36174 | 1.4  |
| 93875_at    | Hsp70-3        | heat shock protein, 70 kDa 3                                                       | Mm.88432 | 1.4  |
| 92408_at    | none           | ESTs, Weakly similar to down-regulated by Ctnnb1, a [Mus musculus] [M.musculus]    | Mm.41046 | 1.4  |
| 94356_at    | Trp53bp1       | transformation related protein 53 binding protein 1                                | Mm.25231 | 1.4  |
| 104641_f_at | none           | Mus musculus, Similar to RIKEN cDNA 9030624G23 gene, clone MGC:40732 IMAGE:5362444 | Mm.31130 | 1.4  |
